# Supplementary material for: Self-curing triphenol A-based phthalonitrile resin precursor acts as a flexibilizer and curing agent for phthalonitrile resin
Source: Royal Society of Chemistry journal article supplement (doi:10.1039/c8ra06926c), 2018-01-01
Supplement: c8ra06926c1.pdf [file c8ra06926c1.pdf]

---

## SUPPORT INFORMATION

### A self-curing triphenol A-based phthalonitrile resin precursor acts as flexibilizer and curing agent for phthalonitrile resin

Yue Hu,<sup>a</sup> Zhihuan Weng\*,<sup>a</sup> Yu Qi,<sup>a</sup> Jinyan Wang,<sup>a</sup> Shouhai Zhang,<sup>a</sup> Cheng Liu,<sup>a</sup> Lishuai Zong,<sup>a</sup> and Xigao Jian<sup>a</sup>

<sup>a</sup> State Key Laboratory of Fine Chemicals, Liaoning High Performance Resin Engineering Research Center, Department of Polymer Science & Materials, Dalian University of Technology, Dalian 116024, P.R. China.  
Email: zweng@dlut.edu.cn

**Table 1S.** The reactions conditions for preparing TPPA-Ph precursors.

**Figure 1S.** LC-MS of TPPA-Ph precursor and molecular ion peaks in negative mode of products.

**Figure 2S.** Conversion  $\alpha$  as a function of temperature for TPPA-Ph (P4) at various heating rates.

**Figure 3S.** Starink plots at various degrees of conversion for TPPA-Ph (P4).

**Figure 4S.** Variation of  $E\alpha$  versus  $\alpha$  for TPPA-Ph (P4) (Starink method).

**Scheme 1S.** Synthesis of resorcinol-based phthalonitrile resin precursor (DPPH).

**Figure 5S.** <sup>1</sup>H NMR spectrum of DPPH.

**Table 1S.** The reactions conditions for preparing TPPA-Ph precursors.

| TPPA-Ph precursors | The molar ratio of TPPA : K <sub>2</sub> CO <sub>3</sub> : NPh | Reaction temperature (°C) | Reaction time (h) |
|--------------------|----------------------------------------------------------------|---------------------------|-------------------|
| P1                 | 1:2.5:3.2                                                      | 80                        | 24                |
| P2                 | 1:1.5:3.1                                                      | 25                        | 24                |
| P3                 | 1:1.5:2.05                                                     | 25                        | 24                |
| P4                 | 1:1.5:1.05                                                     | 25                        | 24                |

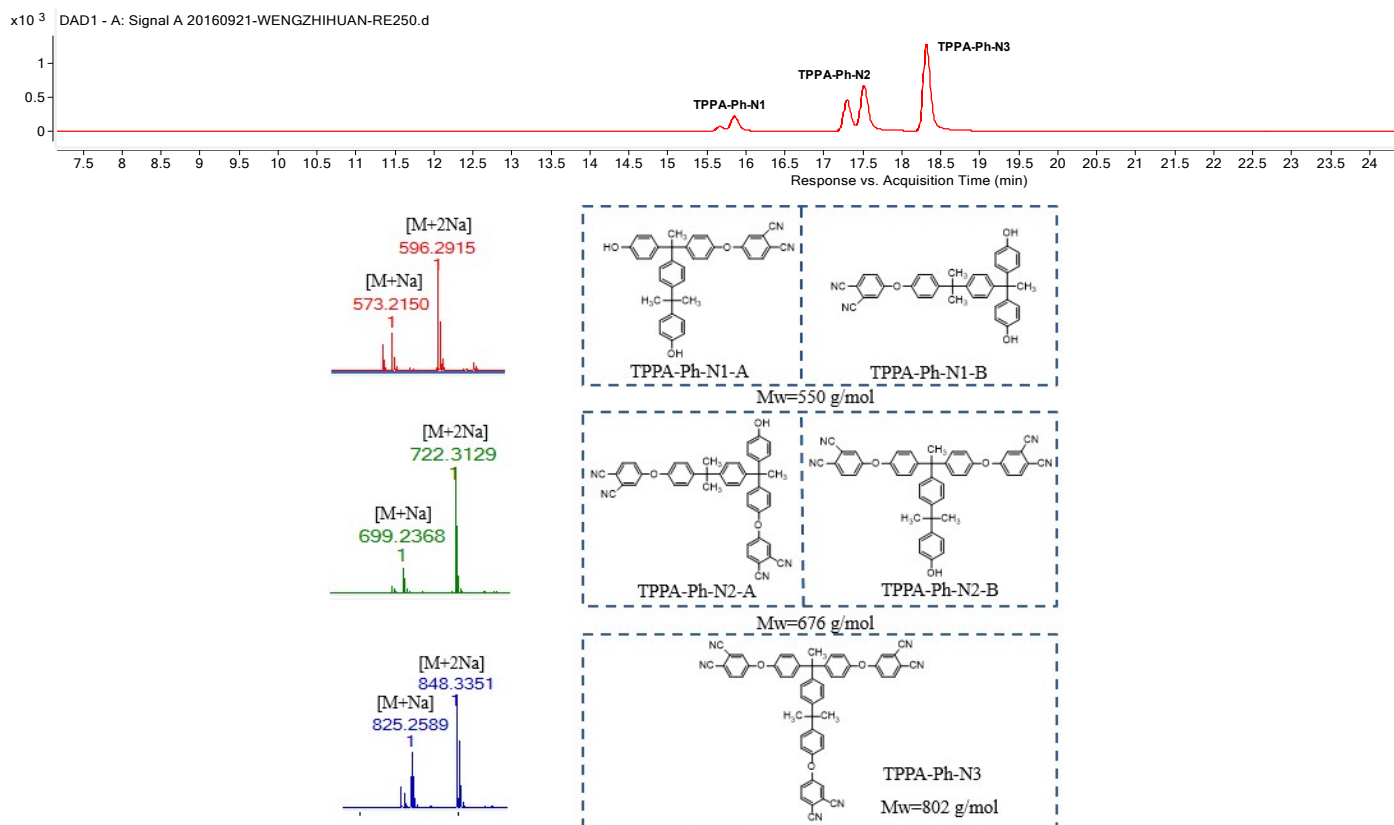

**Figure 1S.** LC-MS of TPPA-Ph (P2) and molecular ion peaks in negative mode of products.

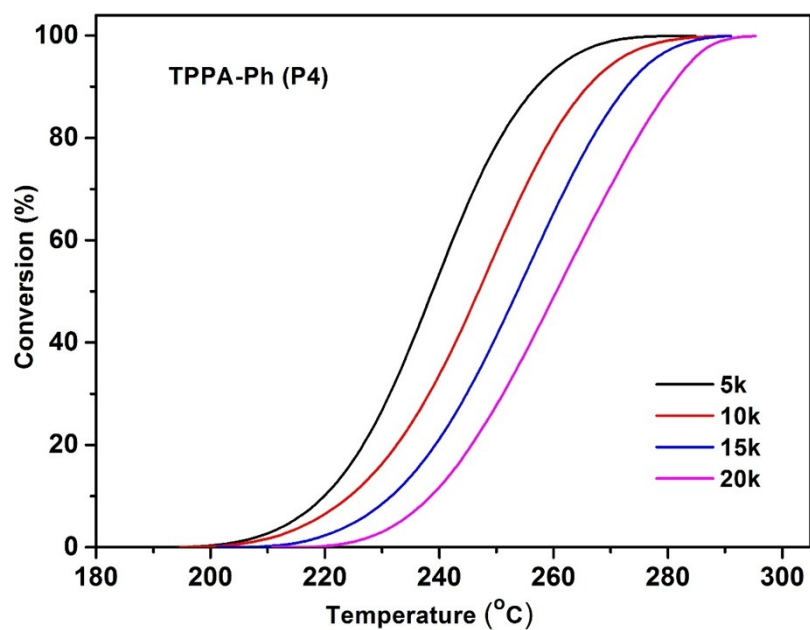

Figure 2S. Conversion  $\alpha$  as a function of temperature for TPPA-Ph (P4) at various heating rates.

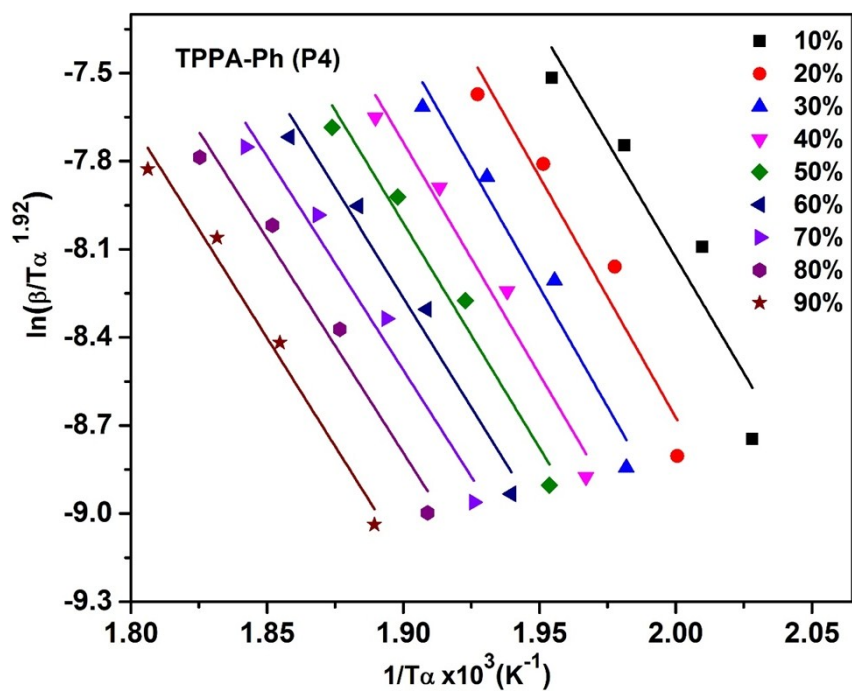

Figure 3S. Starink plots at various degrees of conversion for TPPA-Ph (P4).

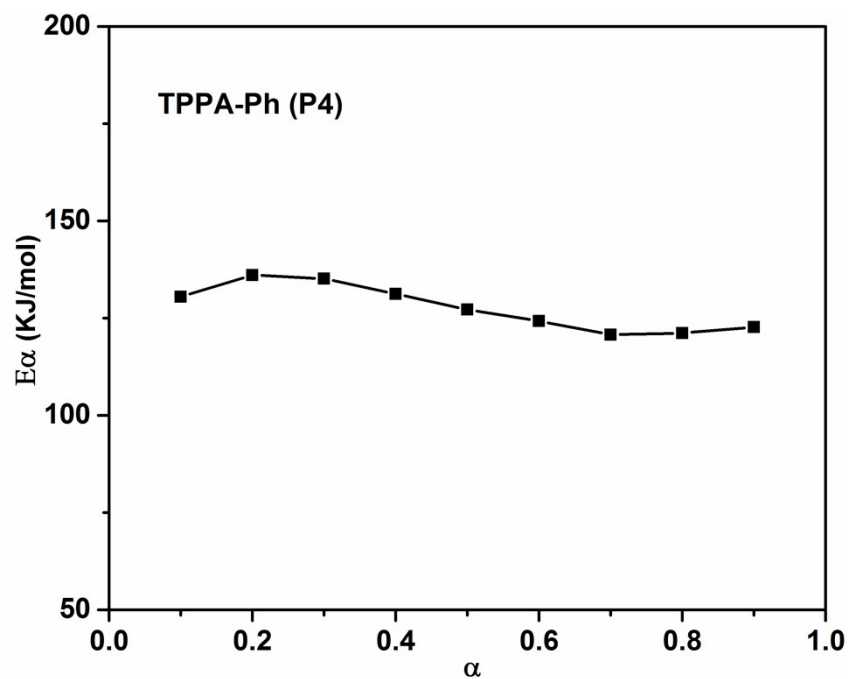

**Figure 4S.** Variation of  $E\alpha$  versus  $\alpha$  for TPPA-Ph (P4) (Starink method).

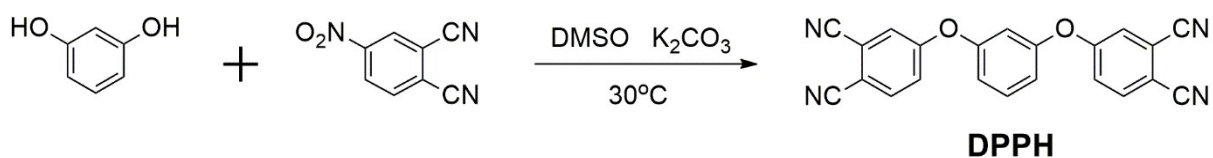

**Scheme 1S.** Synthesis of resorcinol-based phthalonitrile resin precursor (DPPH).

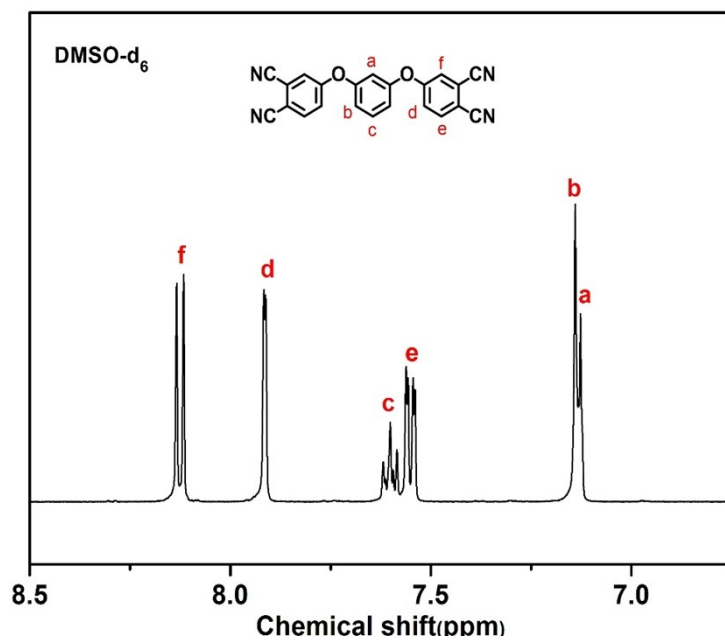

**Figure 5S.**  $^1\text{H}$  NMR spectrum of DPPH.
